# Supplementary material
Source: PubMed Central journal article supplement (PMC3021039)
Supplement: 1016902108_pnas.201016902SI.pdf [file 1016902108_pnas.201016902SI.pdf]

# Supporting Information

Jimenez et al. 10.1073/pnas.1016902108

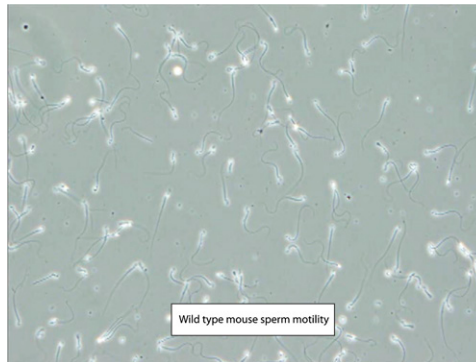

**Movie S1.** Motility recordings of wild-type mouse sperm. Motility documentation at real time was recorded with a CCD Olympus DP71 (Olympus) mounted on an inverted Olympus IX71 (Olympus) microscope. Recordings were performed under bright field using a 20 $\times$  objective. Movies were prepared using Camtasia Studio 5 software (TechSmith).

[Movie S1](#)

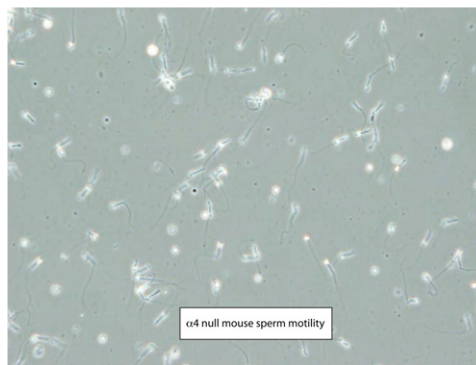

**Movie S2.** Motility recordings of  $\alpha$ 4-null mouse sperm. Sperm shows a severe reduction in motility. In addition, most of the  $\alpha$ 4-null sperm shows a bend or complete retroflexion of the head and midpiece over the rest of the flagellum. Motility documentation at real time was recorded as explained in [Movie S1](#).

[Movie S2](#)
